# Supplementary material for: Optimal Thyrotropin Suppression Therapy in Low-Risk Thyroid Cancer Patients after Lobectomy
Source: PubMed Central journal article supplement (PMC6780946; doi:10.3390/jcm8091279), 2019-08-22
Supplement: jcm-08-01279-s001.pdf [file jcm-08-01279-s001.pdf]

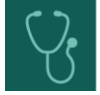

**Supplement Table S1.** Baseline characteristics of patients who excluded from this study.

|                          | <b>Total patients (<i>n</i> = 1764)</b> |
|--------------------------|-----------------------------------------|
| Age (years, mean±SD)     | 45.91 ± 11.92                           |
| Sex                      |                                         |
| Male                     | 219 (12.4%)                             |
| Female                   | 1,545 (87.6%)                           |
| Tumor size (cm, mean±SD) | 1.76 ± 1.34                             |
| Thyroiditis              |                                         |
| No                       | 1,167 (66.2%)                           |
| Yes                      | 597 (33.8%)                             |
| Multifocality            |                                         |
| No                       | 1,229 (69.7%)                           |
| Yes                      | 535 (30.3%)                             |
| N stage                  |                                         |
| N0                       | 390 (22.1%)                             |
| N1a                      | 1,374 (77.9%)                           |
| ATA risk                 |                                         |
| Indeterminate            | 1,607 (91.1)                            |
| High                     | 157 (8.9)                               |
| Recurrence               |                                         |
| No                       | 1,581 (89.6%)                           |
| Yes                      | 183 (10.4%)                             |

ATA, America Thyroid Association; D, standard deviation.
